# Supplementary material for: The chromatin remodeller CHD4 regulates transcription factor binding to both prevent activation of silent enhancers and maintain active regulatory elements
Source: eLife journal article supplement (doi:10.7554/elife.109280), 2025-11-20
Supplement: fig5-data1 [file Figure 5_Source Data 1.pdf › Figure 5_Source Data 1.pdf]

Nucleoplasm Chromatin  
0 0.5 1 4 0 0.5 1 4 hr +Auxin

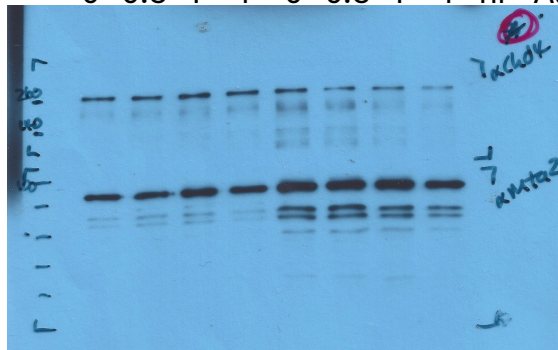

$\alpha$ CHD4

Nucleoplasm Chromatin  
0 0.5 1 4 0 0.5 1 4 hr +Auxin

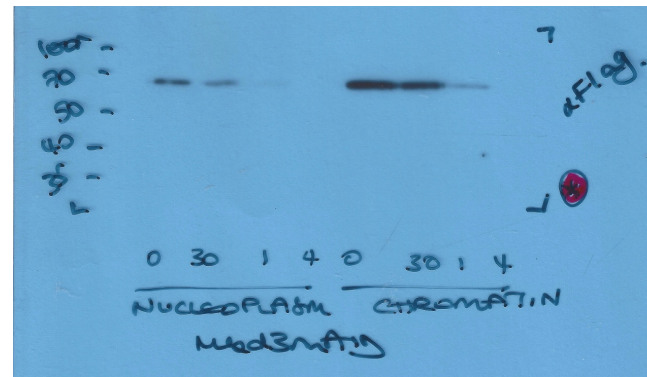

$\alpha$ FLAG (MBD3-FLAG)

Nucleoplasm Chromatin  
0 0.5 1 4 0 0.5 1 4 hr +Auxin

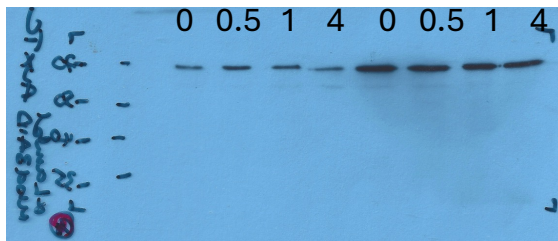

$\alpha$ LAMINB1

Nucleoplasm Chromatin  
0 0.5 1 4 0 0.5 1 4 hr +Auxin

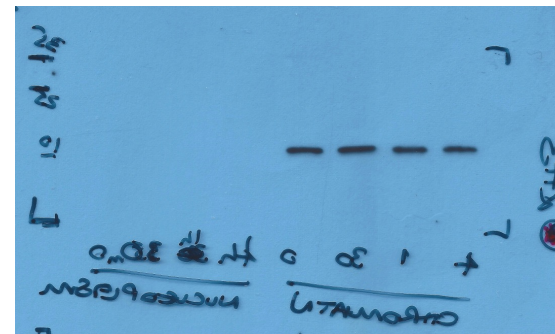

$\alpha$ HISTONE H3

Nucleoplasm Chromatin  
0 0.5 1 4 0 0.5 1 4 hr +Auxin

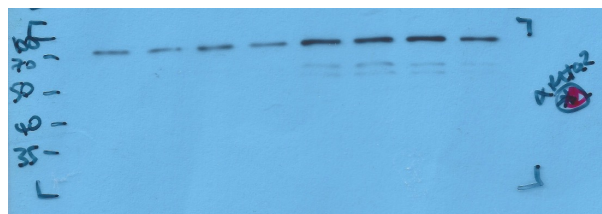

$\alpha$ MTA2
