# Supplementary figures and images for: The chromatin remodeller CHD4 regulates transcription factor binding to both prevent activation of silent enhancers and maintain active regulatory elements
Source: eLife journal article supplement (doi:10.7554/elife.109280), 2025-11-20

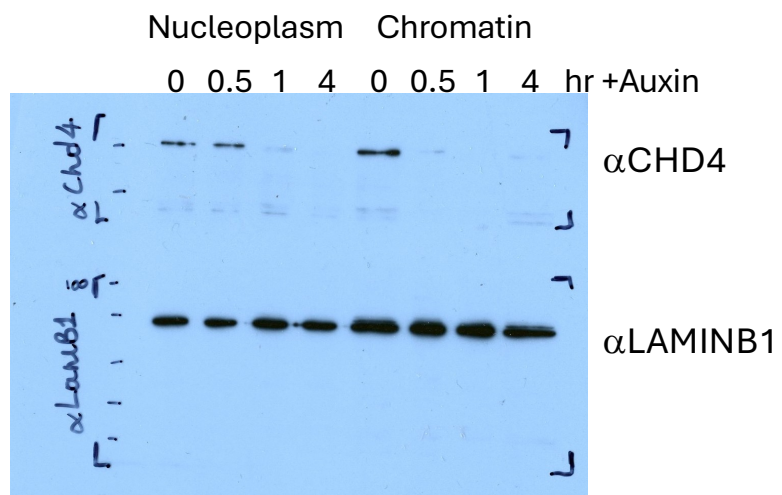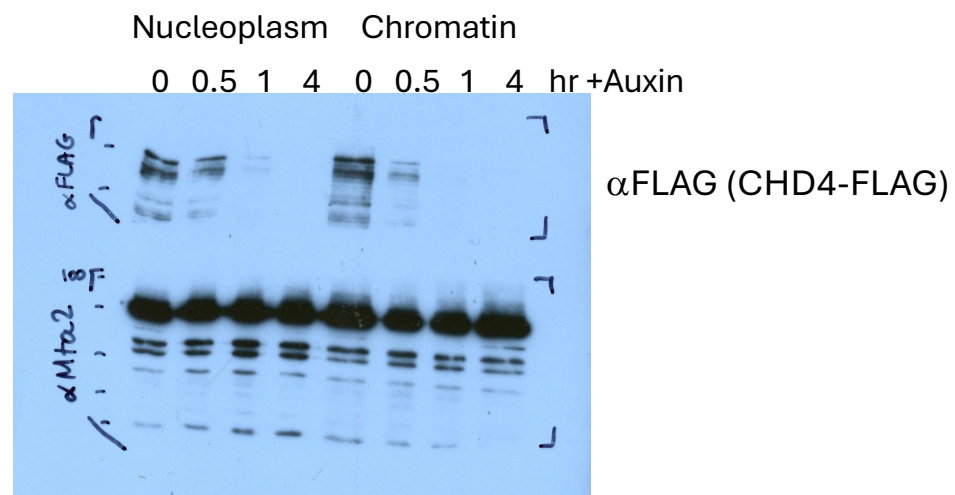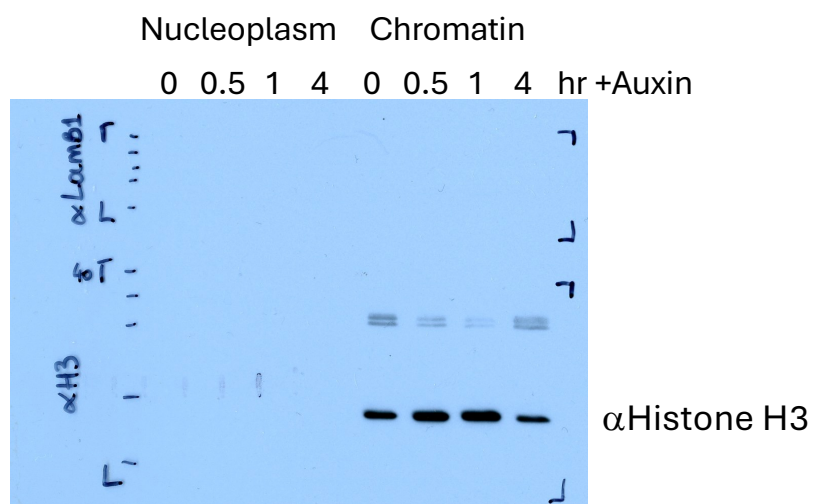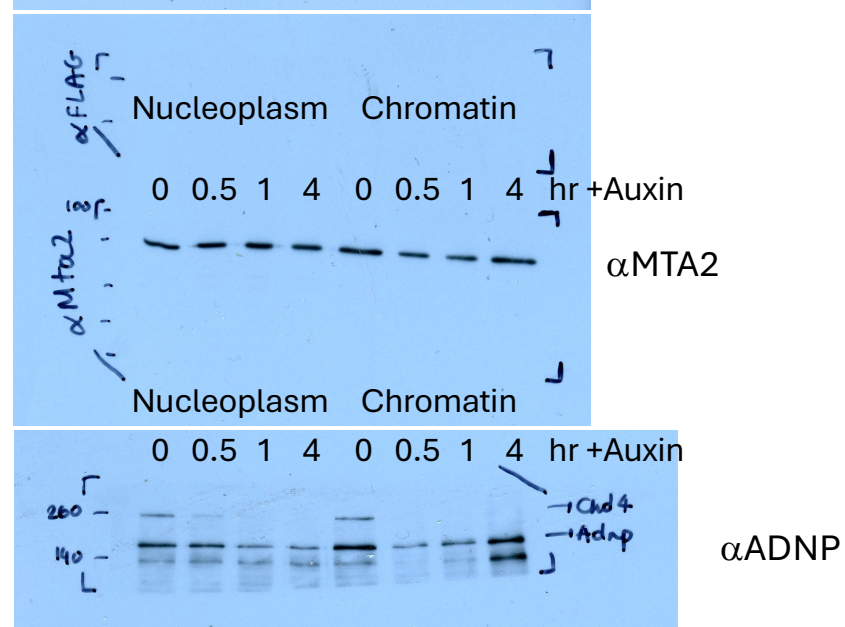

Supplement: fig1-data1 [file Figure 1 - Source Data 1.pdf › Figure 1 - Source Data 1.pdf]
